# Supplementary material for: Host-Induced Gene Silencing of an Adenylate Kinase Gene Involved in Fungal Energy Metabolism Improves Plant Resistance to Verticillium dahliae
Source: PubMed Central journal article supplement (PMC7023357; doi:10.3390/biom10010127), 2020-01-12
Supplement: biomolecules-10-00127-s001.pdf [file biomolecules-10-00127-s001.pdf]

Supplementary Materials:

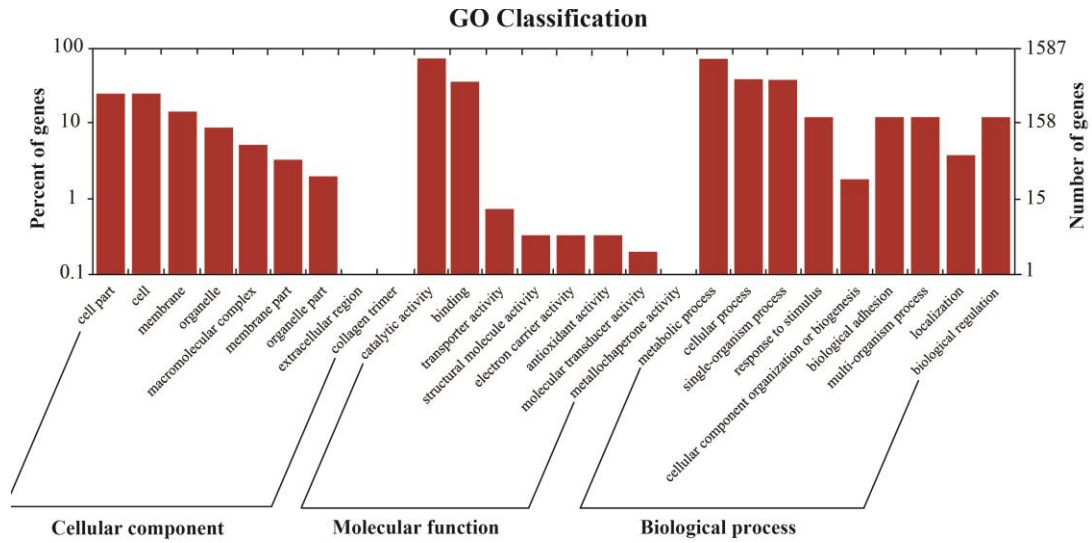

Figure S1. GO classification of predicted protein-encoding genes of *V. dahliae* strain VdLs.17.

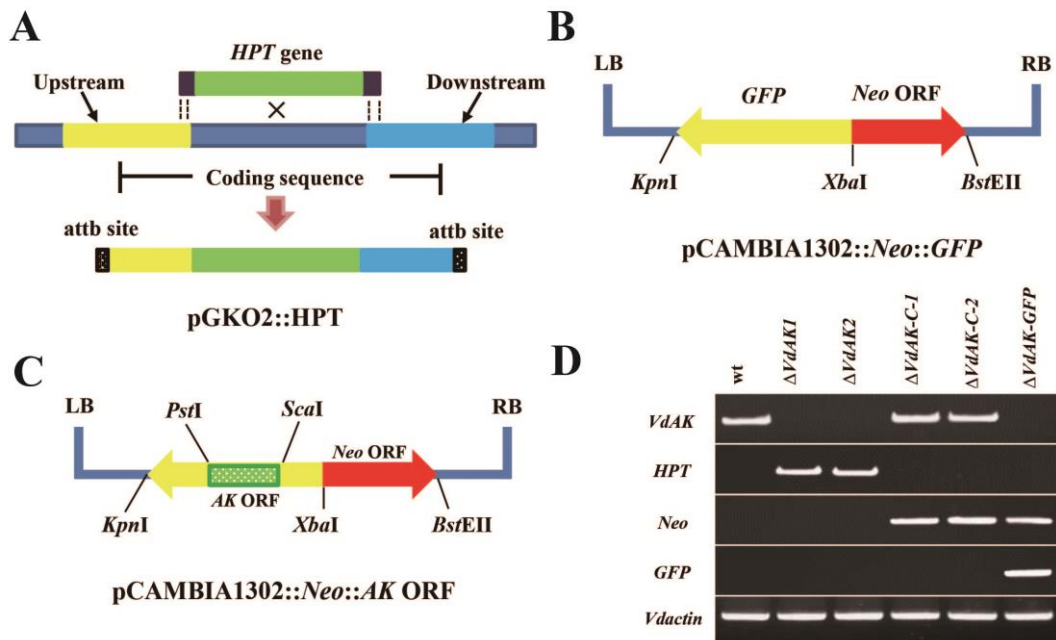

Figure S2. Generation of disruption ( $\Delta VdAK$ ), complementation ( $\Delta VdAK-C$ ) and  $\Delta VdAK-GFP$  strains via homologous recombination. (A) Construction of *VdAK*-disrupted mutant  $\Delta VdAK$ . About 1.5 kb upstream and downstream of targeted gene were fused with the hygromycin resistance cassette. The whole fragment, with attb sites, was cloned using nested PCR. (B) Construction of  $\Delta VdAK-GFP$ . The neomycin resistance cassette, containing XbaI and BstEII restriction sites, was cloned into the pCAMBIA1302 vector. The GFP expression cassette was then cloned into the intermediate plasmid by XbaI/KpnI double-digestion (designated pCAMBIA1302::Neo::GFP). (C) Construction of  $\Delta VdAK-C$ . The GFP ORF of plasmid pCAMBIA1302::Neo::GFP was replaced with *VdAK* ORF via ScaI/PstI double digestion

(designated pCAMBIA1302::Neo::VdAK). (D) Expression of the targeted genes was confirmed by RT-PCR.

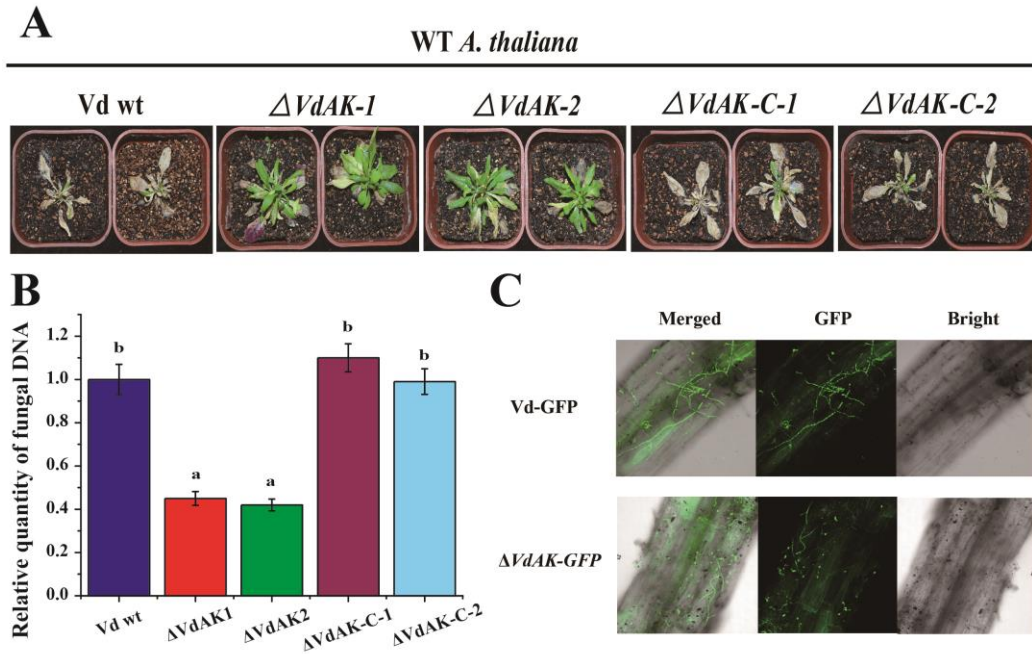

**Figure S3.** Virulence analysis of disruption ( $\Delta VdAK$ ) and complementation ( $\Delta VdAK-C$ ) mutants and wild-type *Vd* in *A. thaliana*. (A) Symptoms on seedlings at 12 days after roots were dipped in  $10^6$  spores/mL of  $\Delta VdAK$ ,  $\Delta VdAK-C$  or wild-type *Vd*. (B) Relative amounts of fungal DNA determined by RT-qPCR. Means ( $\pm$ SE) from three independent experiments that significantly differed among treatments in Duncan's test ( $P < 0.05$ ) are indicated with different letters. (C) Micrographs of fluorescing fungal hyphae in *A. thaliana* root tips at 5 days post inoculation with *Vd-GFP* or  $\Delta VdAK-GFP$ .

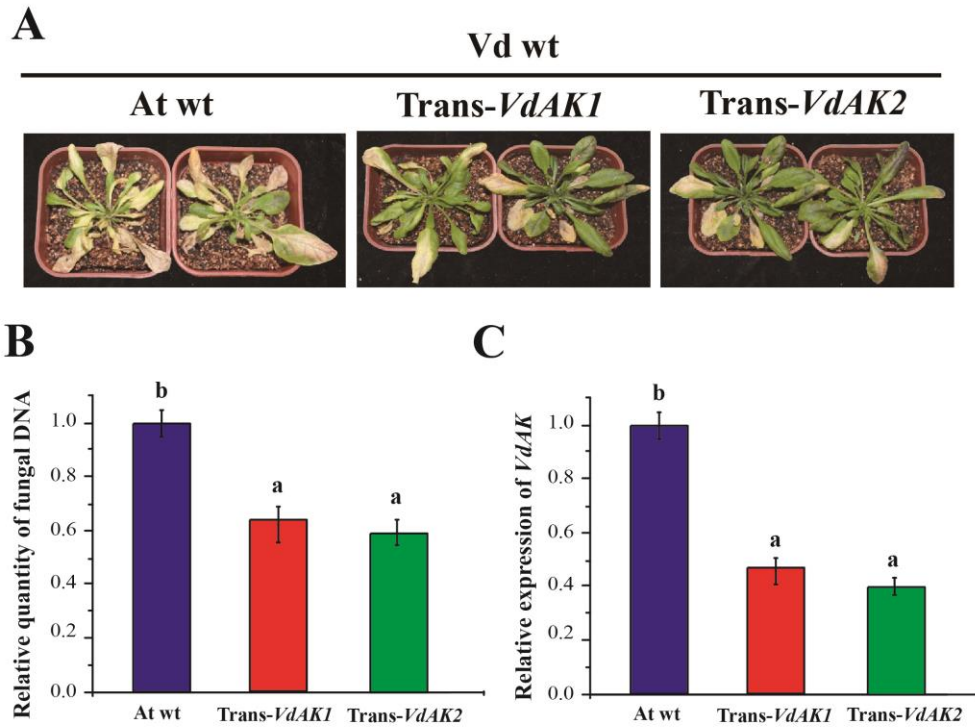

**Figure S4.** Expression of dsRNAs of *VdAK* in *A. thaliana* led to increased resistance against *Vd*. (A) Symptoms on transgenic and wild-type plants at 12 days after roots were dipped in  $10^6$  spores/mL of the respective strains. (B) Relative amounts of fungal DNA determined by RT-qPCR. (C) Transcript levels of *VdAK* in stems of transgenic and wild-type plants. Means ( $\pm$ SE) from three independent experiments were analyzed for significant differences among treatments using Duncan's test ( $P < 0.05$ ).

**Table S1. Information on RNAi constructs targeting 92 *V. dahliae* genes selected for HIGS and disease index from 10-12 days post inoculation of construct-treated plants**

| RNAi constr | Primer sequences (5' to 3')                                   | Gene IDs         | Annotations                             | Disease index |        |        |
|-------------|---------------------------------------------------------------|------------------|-----------------------------------------|---------------|--------|--------|
|             |                                                               |                  |                                         | 10 dpi        | 11 dpi | 12 dpi |
| TRV:00      |                                                               |                  |                                         | 100           | 100    | 100    |
| 1           | ATAGAATCCGTTATCCT<br>CGTCGGTGC<br>ATAGGATCCAGACACGG<br>CCCGAG | VDAG_01<br>040.1 | Adenylate kinase                        | 15            | 20     | 25     |
| 2           | ATAGAATCCCATTTCAG<br>ACTGCCAG<br>ATAGGATCCCTCCTCCA<br>AAGATCC | VDAG_05<br>976.1 | Alpha-amylase A<br>type-1/2             | 15            | 55     | 65     |
| 3           | ATAGAATTCATGGCGCA<br>GAACCCC<br>GCGTATGGAAATCCTCT<br>CGTCCC   | VDAG_07<br>833.1 | Ankyrin<br>repeat-containing<br>protein | 60            | 80     | 90     |

|    |                                                                                     |                  |                                               |    |    |    |
|----|-------------------------------------------------------------------------------------|------------------|-----------------------------------------------|----|----|----|
| 4  | ATAGAATTCTTGTCCTCT<br>CCAACG<br>GGTGTAGATGAAGACAT<br>CGTACAAG<br>AGTGAATTCGTGCTTCAA | VDAG_07<br>739.1 | Aquaporin-3                                   | 18 | 20 | 24 |
| 5  | GCGTAC<br>AGAGGATCCCCCTTGAA<br>GAGAGAC<br>AGAGAATTCATGGATTA                         | VDAG_07<br>535.1 | ADP, ATP carrier<br>protein                   | 20 | 30 | 35 |
| 6  | CCAGGGTTC<br>TGAGGATCCCACCTTGTA<br>GCAGATC<br>ATAGAATTCATGTCGGA                     | VDAG_00<br>201.1 | Cellular nucleic<br>acid-binding<br>protein   | 20 | 55 | 70 |
| 7  | GAACCTCGC<br>ATAGGATCCGACAGTCA<br>AGATGCC<br>ATAGAATTCGGTCATCG                      | VDAG_02<br>332.1 | Aconitate hydratase                           | 20 | 45 | 70 |
| 8  | AGCCTGG<br>ATATGGATCCGGAATCG<br>TGTTCTCC<br>AGAGAATTCTCGTCATC                       | VDAG_01<br>206.1 | Pyruvate kinase                               | 20 | 40 | 55 |
| 9  | CGCAGTG<br>ATAGGATCCCTTGTGGCT<br>CCTCTG<br>ATAGAATTCACCGGAGG                        | VDAG_09<br>094.1 | Peroxisomal<br>membrane protein<br>PEX30      | 30 | 40 | 45 |
| 10 | ACTCGGG<br>ATAGGATCCCCTTGATC<br>GTCCAGC<br>AGAGAATTCTGCTAACA                        | VDAG_03<br>613.1 | NADPH<br>dehydrogenase                        | 25 | 50 | 65 |
| 11 | AGGCCGGC<br>AGAGGATCCAGTGGATG<br>ACCGAGG<br>ATAGAATTCCAATCGAC                       | VDAG_04<br>294.1 | 60S Acidic<br>ribosomal protein<br>P0         | 40 | 55 | 75 |
| 12 | GGCATCC<br>ATAGGATCCTGCAATCG<br>ATGCTCC<br>AGAGAATTCCAACCTCT                        | VDAG_01<br>123.1 | Hard-surface<br>induced protein               | 35 | 50 | 75 |
| 13 | ACGACGCC<br>ATAGGATCCCACGGAGC<br>TTATCGG<br>ATAGAATTCATCAAGGC                       | VDAG_01<br>774.1 | Malate synthase                               | 60 | 70 | 80 |
| 14 | GCTCAAGC<br>AGAGGATCCAGTGAGCA<br>TGAGACG                                            | VDAG_03<br>232.1 | Oligosaccharyl<br>transferase STT3<br>subunit | 10 | 25 | 35 |

|    |                                                                   |                  |                                                     |    |    |     |
|----|-------------------------------------------------------------------|------------------|-----------------------------------------------------|----|----|-----|
| 15 | ATAGAATTCGTGCCGAC<br>ATCGACC<br>ATAGGATCCGCCCACTG<br>AATAGAGC     | VDAG_08<br>270.1 | Transport protein<br>BOS1                           | 75 | 90 | 100 |
| 16 | ATAGAATTCGACACGGA<br>GTACTCCG<br>AGAGGATCCTGCTGGTG<br>ATATGCC     | VDAG_05<br>521.1 | Vacuolar protein<br>sorting-associated<br>protein   | 50 | 75 | 90  |
| 17 | ATAGAATTCATCAAGCG<br>ACCGAGAGG<br>ATAGGATCCATGCTCCCT<br>GTCAGC    | VDAG_01<br>656.1 | Viral A-type<br>inclusion protein<br>repeat protein | 25 | 60 | 75  |
| 18 | ATAGAATTCGAGCCAGC<br>CCAACAG<br>AGAGGATCCTGGACAAG<br>GTGTACTCG    | VDAG_06<br>474.1 | cAMP-dependent<br>protein kinase                    | 45 | 65 | 75  |
| 19 | ATAGAATTCACCTTCCA<br>GGACTCC<br>ATAGGATCCTCTCTTCTG<br>GGTACCG     | VDAG_06<br>474.1 | cAMP-dependent<br>protein kinase                    | 80 | 85 | 95  |
| 20 | AGAGAATTCGCAGGCTA<br>CATCAGCG<br>ATAGGATCCGTGCTCAG<br>CTCGTACG    | VDAG_02<br>311.1 | Solute carrier family<br>25 member 45               | 50 | 70 | 85  |
| 21 | AGAGAATTCCTGGAAAG<br>GCACCTGC<br>ATAGGATCCAGGCATGA<br>GAACGCC     | VDAG_00<br>714.1 | Argininosuccinate<br>lyase                          | 20 | 25 | 30  |
| 22 | TGTGAATTCGGCCTCGA<br>GTATAAGG<br>ATAGGATCCGCCTTAC<br>GTACTCG      | VDAG_00<br>317.1 | Cryptochrome<br>DASH                                | 65 | 75 | 85  |
| 23 | AGAGAATTCGTACGTCC<br>GCTCCTGC<br>ATAGGATCCGAGATCTG<br>GGTCACGG    | VDAG_05<br>375.1 | Covalently-linked<br>cell wall protein              | 70 | 80 | 95  |
| 24 | ATAGAATCCAACGTGA<br>CTCCTGGC<br>AGTGGATCCTTAACACT<br>CGTCCGTC     | VDAG_10<br>495.1 | Endoglucanase B                                     | 65 | 75 | 85  |
| 25 | ATAGAATTCAACGCTGT<br>CTACTTCACG<br>ATAGGATCCTGAGGTAG<br>TAGTTGACG | VDAG_04<br>416.1 | Chitinase A                                         | 60 | 70 | 90  |

|    |                                                                  |                  |                                                                       |    |    |    |
|----|------------------------------------------------------------------|------------------|-----------------------------------------------------------------------|----|----|----|
| 26 | AGAGAATTCGGAGCATA<br>CTGACGTCC<br>ATAGGATCCTGTGCACA<br>GACTGATGC | VDAG_09<br>689.1 | Guanine<br>nucleotide-binding<br>protein subunit beta                 | 55 | 65 | 80 |
| 27 | AGAGAATTCGCCTACCA<br>GGAAGACC<br>ATAGGATCCGGACTTGA<br>TGTAGGCC   | VDAG_07<br>192.1 | 1,3-Beta-glucanosylt<br>ransferase gel4                               | 55 | 65 | 80 |
| 28 | ATAGAATTCCACGCTCA<br>ACACGACC<br>TTAGGATCCCTCCATGGT<br>GTACTCG   | VDAG_02<br>243.1 | 1,3-Beta-glucanosylt<br>ransferase gel1                               | 55 | 75 | 85 |
| 29 | ATAGAATTCCTTGGCCTT<br>AGCTGGC<br>TTAGGATCCTCTAGGGTT<br>GAGCCG    | VDAG_02<br>071.1 | Glucosyltransferase<br>H                                              | 60 | 70 | 85 |
| 30 | TGAGAATTCTACAGCCA<br>GCTCTCGC<br>ATAGGATCCCGCTGGAT<br>ATCGAGC    | VDAG_06<br>369.1 | GTP-binding<br>protein GTR2                                           | 40 | 50 | 65 |
| 31 | AGAGAATTCCTGAGGAC<br>TCAGCAGGC<br>ATAGGATCCCGGATGTG<br>CTTCAGG   | VDAG_10<br>151.1 | NADH-ubiquinone<br>oxidoreductase 21<br>kDa subunit                   | 60 | 70 | 80 |
| 32 | TGAGAATTCACAGTCGA<br>GCTCGACG<br>ATAGGATCCGGCTGAGA<br>GAACAGGC   | VDAG_04<br>456.1 | Nuclear pore<br>glycoprotein p62                                      | 50 | 60 | 70 |
| 33 | TTAGAATTCGACCACA<br>GCATCACG<br>ATAGGATCCGGATCATC<br>TCAGTGCG    | VDAG_03<br>673.1 | Nuclear distribution<br>protein nudeE                                 | 20 | 30 | 35 |
| 34 | TGAGAATTCTTCTCCA<br>ACGTCCG<br>AGAGGATCCTAATGTTG<br>GACATGCG     | VDAG_09<br>326.1 | GTP-binding<br>protein GTR1                                           | 40 | 45 | 55 |
| 35 | AGAGAATTCOAACCGTC<br>TGGCTACC<br>TTAGGATCCCAATGATC<br>AGAGGGC    | VDAG_09<br>877.1 | Aspartyl/glutamyl-t<br>RNA (Asn/Gln)<br>amidotransferase<br>subunit B | 50 | 65 | 75 |
| 36 | TTAGAATTCGAGCAGGA<br>TTACGTGGC<br>ATAGGATCCATACGAGC<br>CTGCACG   | VDAG_02<br>981.1 | Methyltransferase<br>domain-containing<br>protein                     | 45 | 55 | 65 |

|    |                                                                                      |                  |                                                        |           |           |           |
|----|--------------------------------------------------------------------------------------|------------------|--------------------------------------------------------|-----------|-----------|-----------|
| 37 | ATAGAATTCCAAGCGGA<br>GACTGATGG<br>TTAGGATCCTGAATGTGC<br>AGGTGG<br>TGTGAATTCTCTCCTACT | VDAG_05<br>486.1 | Atrial gland-specific<br>antigen                       | 31.2<br>5 | 56.2<br>5 | 62.5      |
| 38 | CCGTCCG<br>ATAGGATCCGGATATGT<br>CGAGGTCTG<br>AGAGAATTCCTCTTATCT                      | VDAG_00<br>647.1 | Inner centromere<br>protein                            | 6.25      | 12.5      | 18.7<br>5 |
| 39 | GTCGGCGG<br>ATAGGATCCGTTGACGT<br>GAGTCCG<br>ATAGAATTCATCGGGCC                        | VDAG_00<br>787.1 | Hypothetical<br>protein                                | 43.7<br>5 | 50        | 56.2<br>5 |
| 40 | AAGGTGG<br>TTAGGATCCTCACTCAGC<br>ATGCTCG<br>AGAGAATTCTCGCCGAG                        | VDAG_06<br>790.1 | PSP1<br>domain-containing<br>protein                   | 37.5      | 43.7<br>5 | 56.2<br>5 |
| 41 | ATGCTCG<br>ATAGGATCCGGCGTCCA<br>CATTATGG<br>ATAGAATTCGACGAGAT                        | VDAG_08<br>982.1 | Mitogen-activated<br>protein kinase<br>HOG1            | 68.7<br>5 | 81.2<br>5 | 87.5      |
| 42 | TGACGAGG<br>ATAGGATCCTCTCAAGC<br>TCATCAGC<br>AGAGAATTCAGCTCTGG                       | VDAG_03<br>613.1 | NADPH<br>dehydrogenase                                 | 25        | 31.2<br>5 | 37.5      |
| 43 | GATCAAGG<br>ATAGGATCCTTGGTCTCG<br>TCCTCTG<br>ATAGAATTCGCAAGATC                       | VDAG_04<br>020.1 | NADPH<br>dehydrogenase D                               | 40        | 56        | 68        |
| 44 | GCTCTGGC<br>ATAGGATCCGAGGTAGC<br>ACGAGC<br>ATAGAATTCGCCTTGCTT                        | VDAG_08<br>067.1 | Pectate lyase B                                        | 50        | 56.2<br>5 | 62.5      |
| 45 | CGTTCG<br>TAAGGATCCCTGCGAAT<br>GTTGTACC<br>ATAGAATTCGGACGAAG                         | VDAG_05<br>402.1 | Pectate lyase                                          | 56.2<br>5 | 62.5      | 68.7<br>5 |
| 46 | CAGACACG<br>AGAGGATCCTCTCGTGA<br>TAGGGAGG<br>ATAGAATTCGCTTCGAG                       | VDAG_08<br>663.1 | cAMP-dependent<br>protein kinase<br>regulatory subunit | 50        | 55        | 69        |
| 47 | CGTCATGG<br>ATAGGATCCGATCCCGT<br>CATCTCG                                             | VDAG_08<br>656.1 | Cell pattern<br>formation-associate<br>d protein stua  | 56.2<br>5 | 68.7<br>5 | 75        |

|    |                                                                                     |                   |                                                  |    |    |    |
|----|-------------------------------------------------------------------------------------|-------------------|--------------------------------------------------|----|----|----|
| 48 | AGAGAATTCCAATGGCA<br>GCAGAGC<br>ATAGGATCCGGTTCGAGG<br>TATAGGGC<br>TTAGAATTCGTCAACCA | VDAG_06<br>649.1  | Dual specificity<br>protein kinase<br>YAK1       | 20 | 30 | 35 |
| 49 | GCTCGAGG<br>ATAGGATCCCTTGATCAT<br>GGCAGG<br>ATAGAATTCCAGAAGCC                       | VDAG_07<br>142.1  | Polysaccharide<br>deacetylase family<br>protein  | 65 | 75 | 80 |
| 50 | TGTCGTGC<br>ATAGGATCCAATCTCGTT<br>CGTGACG<br>ATAGAATCCGTCACCA                       | VDAG_08<br>977.1  | ATP-dependent<br>protease La                     | 25 | 40 | 45 |
| 51 | TCAACAAGGC<br>ATAGGATCCACCTTGCTC<br>GTGTTGG<br>ATAGAATTCGTCAAGA                     | VDAG_08<br>977.1  | ATP-dependent<br>protease La                     | 55 | 65 | 70 |
| 52 | TACCACGGC<br>ATAGGATCCGTAGCTCT<br>GCGTCAGG<br>ATAGAATTCACGTACGC                     | VDAG_00<br>279.1  | Import receptor                                  | 35 | 45 | 50 |
| 53 | TGCGTATCG<br>TTAGGATCCTGATGGTGT<br>ACTCGGC<br>ATAGAATTCGTCAACCA                     | VDAG_05<br>060.1  | Multidrug<br>resistance protein                  | 65 | 75 | 85 |
| 54 | GGAAGTCG<br>ATAGGATCCTACGGTAA<br>GCCGTCG<br>ATAGAATTCCAACGGTG                       | VDAG_05<br>084.1  | ATP-dependent bile<br>acid permease              | 25 | 30 | 35 |
| 55 | ACCTCAAGG<br>ATAGGATCCCTCCTCAG<br>CCTTCTCC<br>ATAGAATTCGGCAACCG                     | VDAG_04<br>294.1, | 60S Acidic<br>ribosomal protein<br>P0            | 55 | 70 | 75 |
| 56 | AGATAGCC<br>ATAGGATCCCTGGAGTA<br>CGGTAACC<br>AGAGAATTCATGCTCTC                      | VDAG_00<br>335.1  | Secreted protein K                               | 60 | 65 | 70 |
| 57 | CAGCCTC<br>ATAGGATCCTCTCTCTGC<br>AGCACG<br>AGAGAATTCGACGACAT                        | VDAG_07<br>788.1  | Microsomal signal<br>peptidase 18 kDa<br>subunit | 60 | 65 | 70 |
| 58 | GATCTCCCAG<br>ATAGGATCCGGTGAAGG<br>TGACCTCC                                         | VDAG_07<br>546.1  | Stress protein                                   | 55 | 65 | 75 |



|    |                                                                                   |                  |                                                      |    |    |    |
|----|-----------------------------------------------------------------------------------|------------------|------------------------------------------------------|----|----|----|
| 59 | ATAGAATTCACCTGGCC<br>ATGAGGTC<br>ATAGGATCCTGCGACAG<br>CATTAC<br>AGAGAATTCGCAAGACG | VDAG_03<br>187.1 | General stress<br>protein                            | 55 | 65 | 85 |
| 60 | AACGTTCC<br>ATAGGATCCACTCGTGG<br>AAGTGCG<br>ATAGAATTCCTTGGGG                      | VDAG_01<br>389.1 | Glycogen synthase                                    | 65 | 80 | 85 |
| 61 | CTACACCC<br>ATAGGATCCTGCTGCTGC<br>TAGTGCC<br>AGAGAATTCCTCGTTCAT                   | VDAG_01<br>389.1 | Glycogen synthase                                    | 55 | 70 | 90 |
| 62 | CTACGTCG<br>ATAGGATCCCTCTGGTA<br>CGTACTGCC<br>AGAGAATTCCTGGTATCT                  | VDAG_01<br>254.1 | Tryptophan<br>synthase                               | 50 | 55 | 65 |
| 63 | CAAGGCG<br>ATAGGATCCAGTCGTCG<br>TGGTAGG<br>AGAGAATTCCTGGGACT                      | VDAG_07<br>000.1 | Killer toxin subunits<br>alpha/beta                  | 45 | 60 | 65 |
| 64 | ACAAGAGCG<br>ATAGGATCCGAGAGGCT<br>CACAAGC<br>AGAGAATTCTGTCAAC                     | VDAG_00<br>901.1 | Killer toxin subunits<br>alpha/beta                  | 55 | 65 | 70 |
| 65 | AGCAAGCC<br>AGAGGATCCTGTCAAGA<br>ATGGCAC<br>GAGGAATTCAGAATACG                     | VDAG_00<br>825.1 | Vacuolar protease A                                  | 62 | 72 | 80 |
| 66 | TGGAACGGG<br>ATAGGATCCGATGCTGC<br>TCGTTGAC<br>ATAGAATTCCTCCAATCC                  | VDAG_08<br>621.1 | Carbon<br>catabolite-derepress<br>ing protein kinase | 50 | 60 | 75 |
| 67 | GTTGTCC<br>ATAGGATCCAGGAGCAG<br>CTGGTC<br>AGAGAATTCAGTCTGGC                       | VDAG_04<br>529.1 | Thioredoxin                                          | 16 | 23 | 28 |
| 68 | TCATACCG<br>ATAGGATCCAGGTTGGC<br>AACGATG<br>AGAGAATTCGTCGACG                      | VDAG_09<br>532.1 | Serine<br>3-dehydrogenase                            | 60 | 75 | 85 |
| 69 | GCAAGC<br>AGAGGATCCTTGTGCCA<br>GCTGAGG                                            | VDAG_05<br>692.1 | Uricase                                              | 70 | 85 | 95 |

|    |                                                                                   |                  |                                                           |    |    |    |
|----|-----------------------------------------------------------------------------------|------------------|-----------------------------------------------------------|----|----|----|
| 70 | AGAGAATTCGCAAGCGT<br>CCAGAAG<br>ATAGGATCCAGACCCAG<br>GACCCTC<br>TATGAATTCGGTCGCAC | VDAG_09<br>026.1 | NADH-ubiquinone<br>oxidoreductase 29.9<br>kDa subunit     | 25 | 30 | 35 |
| 71 | AGTACAACG<br>ATAGGATCCCGACTCAA<br>TGTCGAGG<br>AGAGAATTCGCGAGGAG                   | VDAG_01<br>642.1 | Pyruvate<br>dehydrogenase E1<br>component subunit<br>beta | 70 | 90 | 95 |
| 72 | ACTCTGCC<br>ATAGGATCCGGTTGGAG<br>CCGTACC<br>ATAGAATTCGGTTCAAG                     | VDAG_03<br>252.1 | Glycine-rich<br>RNA-binding<br>protein                    | 60 | 70 | 75 |
| 73 | AATATGCCG<br>TATGGATCCACCGTGAG<br>ACTTGAC<br>CTAGAATTCAGGGCAT                     | VDAG_07<br>546.1 | Stress protein                                            | 10 | 15 | 20 |
| 74 | CCTCGTTC<br>ATAGGATCCCCAGAAGT<br>CTTCAGCC<br>ATAGAATTCCTCCGGC                     | VDAG_06<br>669.1 | Hypothetical<br>protein                                   | 70 | 85 | 90 |
| 75 | ATGAAGG<br>TTAGGATCCTGAGCACC<br>TCCATCG<br>AGTGAATTCTGCGATTGC                     | VDAG_08<br>238.1 | Glycerate kinase                                          | 80 | 85 | 90 |
| 76 | GACATCC<br>ATAGGATCCCTATCCGA<br>CCCATGGC<br>ATAGAATTCGTCATCTGA                    | VDAG_04<br>980.1 | Thymidylate kinase                                        | 60 | 70 | 85 |
| 77 | GCAGCAGC<br>ATAGGATCCGCATTGTA<br>GCTCATGG<br>ATAGAATTCGGCACCA                     | VDAG_01<br>726.1 | Choline kinase                                            | 70 | 90 | 95 |
| 78 | CGGTCAT<br>ATAGGATCCCGAGGACA<br>CGAGCAC<br>ATAGAATTCGTGTTGGTT                     | VDAG_02<br>259   | Glutamate<br>decarboxylase                                | 65 | 75 | 95 |
| 79 | GAGTCGA<br>ATAGGATCCAACAGCCC<br>CGTGCCGA<br>ATAGAATTCCTCCGCTCCT                   | VDAG_06<br>992   | Ferric reductase<br>transmembrane<br>component 4          | 60 | 70 | 85 |
| 80 | GCGTCCC<br>ATAGGATCCGATCTGGG<br>TCACGGC                                           | VDAG_04<br>380   | Cytochrome P450 51                                        | 65 | 75 | 85 |

|    |                                                                  |                   |                                                   |    |    |     |
|----|------------------------------------------------------------------|-------------------|---------------------------------------------------|----|----|-----|
| 81 | ATAGAATTCATTCCAAC<br>GTGACTC<br>ATAGGATCCCTTAACAC<br>TCGTCCG     | VDAG_10<br>495    | Endoglucanase B                                   | 30 | 35 | 40  |
| 82 | ATAGAATTCTCGAGCCA<br>GCCCAAC<br>ATAGGATCCCTGGACAA<br>GGTGTA      | VDAG_06<br>474    | cAMP-dependent<br>protein kinase                  | 60 | 70 | 75  |
| 83 | ATAGAATTCGGTCAACC<br>AGCTCGA<br>ATAGGATCCCCTTGATC<br>ATGGCAGG    | VDAG_07<br>142    | Polysaccharide<br>deacetylase family<br>protein   | 40 | 45 | 60  |
| 84 | ATAGAATTCGCTCAAGC<br>CCTACGGCC<br>ATAGGATCCAGGATCTG<br>GCCGAAGCC | VDAG_01<br>845.1  | Branched-chain-ami<br>no-acid<br>aminotransferase | 65 | 75 | 95  |
| 85 | ATAGAATTCGTGGTGCG<br>CGTCTACC<br>ATAGGATCCGATGGCCA<br>GCTCGAGG   | VDBG_07<br>510.1  | Xylulose-5-phospha<br>te phosphoketolase          | 60 | 70 | 75  |
| 86 | ATAGAATTCCTGACTTC<br>CGGCAAC<br>ATAGGATCCGCGACAGC<br>GTAACGA     | VDAG_05<br>940.1, | 60S Ribosomal<br>protein L2                       | 55 | 60 | 65  |
| 87 | ATAGAATTCGTGTTGGTT<br>GAGTCGA<br>ATAGGATCCAACAGATC<br>CGTGCCG    | VDAG_06<br>992.1  | Ferric reductase<br>transmembrane<br>component 4  | 60 | 80 | 100 |
| 88 | ATAGAATTCOAAGTGGT<br>ACGGCACCA<br>ATAGGATCCCAATGGTC<br>GAGGACAC  | VDAG_01<br>692.1  | Endoglucanase                                     | 55 | 65 | 75  |
| 89 | ATAGAATTCACGGACT<br>TCCTGAC<br>ATAGGATCCAGAGACGG<br>AGTGGGT      | VDBG_00<br>534.1  | 1,3-Beta-glucanosylt<br>ransferase gel1           | 70 | 80 | 90  |
| 90 | ATAGAATTCGAGACCGA<br>GAAGTCG<br>ATAGGATCCACAGAGCG<br>GGCGGGG     | VDBG_07<br>986.1  | PH<br>domain-containing<br>protein                | 65 | 70 | 80  |
| 91 | ATAGAATTCGCACATTGT<br>CGCTCTCG<br>ATAGGATCCCAGGTAGT<br>GGCTCAAGG | VDAG_09<br>595.1  | Chitin synthase<br>export chaperone               | 55 | 64 | 78  |

|    |                   |         |              |    |    |    |
|----|-------------------|---------|--------------|----|----|----|
|    | ATAGAATTCGGCCTCGA |         |              |    |    |    |
| 92 | GTATAAGGA         | VDAG_00 | Cryptochrome | 50 | 70 | 85 |
|    | ATAGGATCCGCCTTAC  | 317.1   | DASH         |    |    |    |
|    | GTACTCGC          |         |              |    |    |    |

**Table S2. Primers used to produce the *VdAK* RNAi construct**

| Primer     | Sequences (5' to 3')                                                           |
|------------|--------------------------------------------------------------------------------|
| trans-VdAK | <u>AAAAAAGCAGGCT</u> CGTTATCCTCGTCGGTGC<br><u>AAGAAAGCTGGGT</u> AGACACGGCCCGAA |
| BP site    | GGGACAAGTTTGTACAAAAAAGCAGGCT<br>GGGACCACTTTGTACAAGAAAGCTGGGT                   |
| Det-VdAK   | ACTCGCCTAACTGTGCCTCTA<br>GGAACCCATCCAGAATGAAGG                                 |

**Table S3. Primers used to construct mutant strains of *V. dahliae***

| Primer                                   | Sequences (5' to 3')                                                                                                                                                                          |
|------------------------------------------|-----------------------------------------------------------------------------------------------------------------------------------------------------------------------------------------------|
| Hygromycin resistant expression cassette | TTGAAGGAGCATTTTTGGGC<br>TTATCTTTGCGAACCCAGGG<br>5F: CAGAGTACCCTGACGGCATCGGC<br>5R:<br>GCCCAAAAATGCTCCTTCAAATCAAGCGCATGATAAGG<br>TCG<br>3F:<br>CCCTGGGTTTCGCAAAGATAACTTCGACGTGATCATGCAG<br>CGC |
| $\Delta$ VdAK                            | 3R: GGAAGTCTCCTGGGGTGGTGGTGG<br>NEST-F:<br><u>GGGGACAAGTTTGTACAAAAAAGCAGGCTCGTCATTCC</u><br>ATTCCACGGACCC<br>NEST-R:<br><u>GGGGACCACTTTGTACAAGAAAGCTGGGTCAAGGTACA</u><br>ATGTCACATACGG        |
| Neomycin resistant expression cassette   | aattctagaGTTTGC GGGCTGTCTTGACG<br>ataggtcaccTACCTGTGCATTCTGGGTAA                                                                                                                              |
| gGFP expression cassette                 | ggctctagaCTTTCGACACTGAAATACGTCG<br>ataggtaccGCATCAGAGCAGATTGTA CTGAGAG                                                                                                                        |
| $\Delta$ VdAK-com                        | aaaagtactATGAGACTTCGAAAGGCAG<br>aaactgcagTCAAGCCGCAAAGCGTTT                                                                                                                                   |
| Det-HPH                                  | TTCGACAGCGTCTCCGACCTGA                                                                                                                                                                        |

|           |                                                                                         |
|-----------|-----------------------------------------------------------------------------------------|
| Det-ΔVdAK | AGATGTTGGCGACCTCGTATTGGG<br>TATAACAAGAATGGTTGGCTGCGTCCC<br>GTGGATGGAAGGTGGTATTGTAGACACG |
| Det-neo   | GTTGTCACTGAAGCGGGAAGGG<br>GCGATACCGTAAAGCACGAGGAA<br>CGACGTAAACGGCCACAAGTT              |
| Det-GFP   | TCTTTGCTCAGGGCGGACTGG                                                                   |

Note: Restriction sites are in bold italic font.

**Table S4. Primers used for RT-qPCR**

| <b>Primer</b> | <b>Sequences (5' to 3')</b>                                      |
|---------------|------------------------------------------------------------------|
| qRT-VdAK      | GTGTCTACAATACCACCTTCCA<br>CTCATCACTGCTCATAACCTC                  |
| qRT-VA        | GGGTATTCAGACCCTATTGGACG<br>CGAACTTCTTGTACTCAGCCTCC               |
| qRT-VdATP6    | CTAGACCAATTTGAAATAAGA<br>AAAGATTCTTGGCTAATAGAT                   |
| qRT-VdAC      | TCTCCATCGTCTTCACCGACATCA<br>TCTGCACGGCGAAACACCACA                |
| qRT-VdATP-PRT | CGACGCCAACGTGCGGTCTACAA<br>GCCCCGAGAAGCTCGTGCCAAT                |
| qRT-Vdactin   | GGCTTCCTCAAGGTCGGCTATG<br>GCTGCATGTCATCCCACCTTCTC                |
| qRT-VdITS     | CCGCCGGTCCATCAGTCTCTCTGTTTATAC<br>CGCCTGCGGGACTCCGATGCGAGCTGTAAC |
| RT-Nbactin    | GGACCTTTATGGAAACATTGTGCTCAGT<br>CCAAGATAGAACCTCCAATCCAGACAC      |
| RT-AtEF-1α    | TGAGCACGCTCTTCTTGCTTTC<br>GGTGGTGGCATCCATCTTGTTA                 |

**Table S5. Information on sRNAs from *V. dahliae* isolated from *Vd*-infected seedlings**

| <b>Sample</b> | <b>Total sRNAs</b>  | <b>Mapped sRNAs</b> | <b>Total mapped sRNAs</b> |
|---------------|---------------------|---------------------|---------------------------|
| Col_1         | 10786798 (100.00 %) | 6919974 (64.15 %)   | 6650 (0.10 %)             |
| RNAi_1        | 4068549 (100.00 %)  | 3039943 (74.72 %)   | 5015 (0.16 %)             |
| RNAi_2        | 8235986 (100.00 %)  | 5599526 (67.99 %)   | 5090 (0.09 %)             |
| RNAi_3        | 9820717 (100.00 %)  | 6890613 (70.1 %)    | 9929 (0.14 %)             |

**Table S6. Sixteen *Vd* candidate pathogenicity/virulence factor genes identified by HIGS**

| Gene ID      | Annotation                              | Disease index |        |        |
|--------------|-----------------------------------------|---------------|--------|--------|
|              |                                         | 10 dpi        | 11 dpi | 12 dpi |
| VDAG_01040.1 | Adenylate kinase                        | 15            | 20     | 25     |
| VDAG_07535.1 | ADP, ATP carrier protein                | 20            | 30     | 35     |
| VDAG_01206.1 | Pyruvate kinase                         | 20            | 40     | 55     |
| VDAG_09094.1 | Peroxisomal membrane protein PEX30      | 30            | 40     | 45     |
| VDAG_03232.1 | Oligosaccharyl transferase STT3 subunit | 10            | 25     | 35     |
| VDAG_00714.1 | Argininosuccinate lyase                 | 20            | 25     | 30     |
| VDAG_03673.1 | Nuclear distribution protein nudeE      | 20            | 30     | 35     |
| VDAG_00647.1 | Inner centromere protein                | 6.25          | 12.5   | 18.75  |
| VDAG_03613.1 | NADPH dehydrogenase                     | 25            | 31.25  | 37.5   |
| VDAG_06649.1 | Dual specificity protein kinase YAK1    | 20            | 30     | 35     |
| VDAG_08977.1 | ATP-dependent protease La               | 25            | 40     | 45     |
| VDAG_05084.1 | ATP-dependent bile acid permease        | 25            | 30     | 35     |
| VDAG_04529.1 | Thioredoxin                             | 16            | 23     | 28     |
| VDAG_09026.1 | NADH ubiquinone oxidoreductase          | 25            | 30     | 35     |
| VDAG_07546.1 | Stress protein                          | 10            | 15     | 20     |
| VDAG_10495.1 | Endoglucanase B                         | 30            | 35     | 40     |
| Control      |                                         | 100           | 100    | 100    |
